# Supplementary material for: Slc15a4, a Gene Required for pDC Sensing of TLR Ligands, Is Required to Control Persistent Viral Infection
Source: PubMed Central journal article supplement (PMC3441671; doi:10.1371/journal.ppat.1002915), 2012-09-13

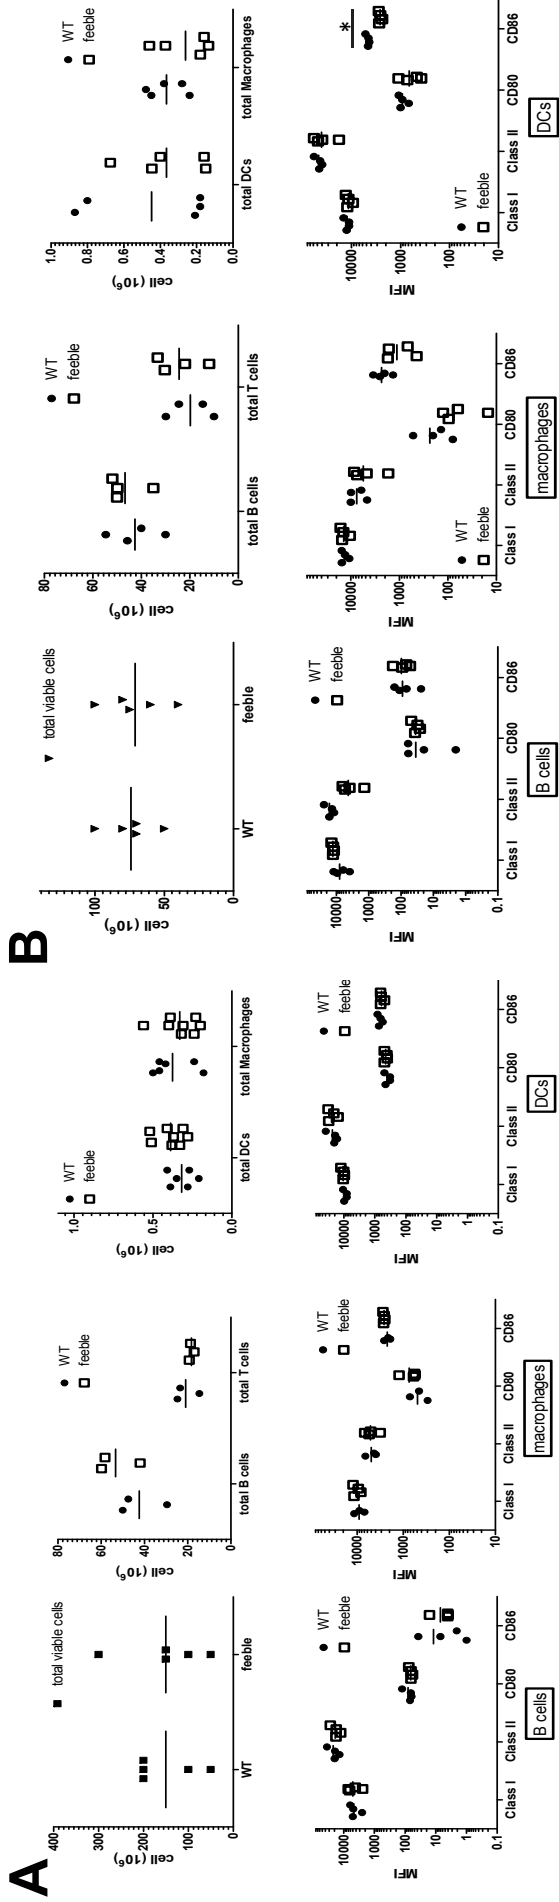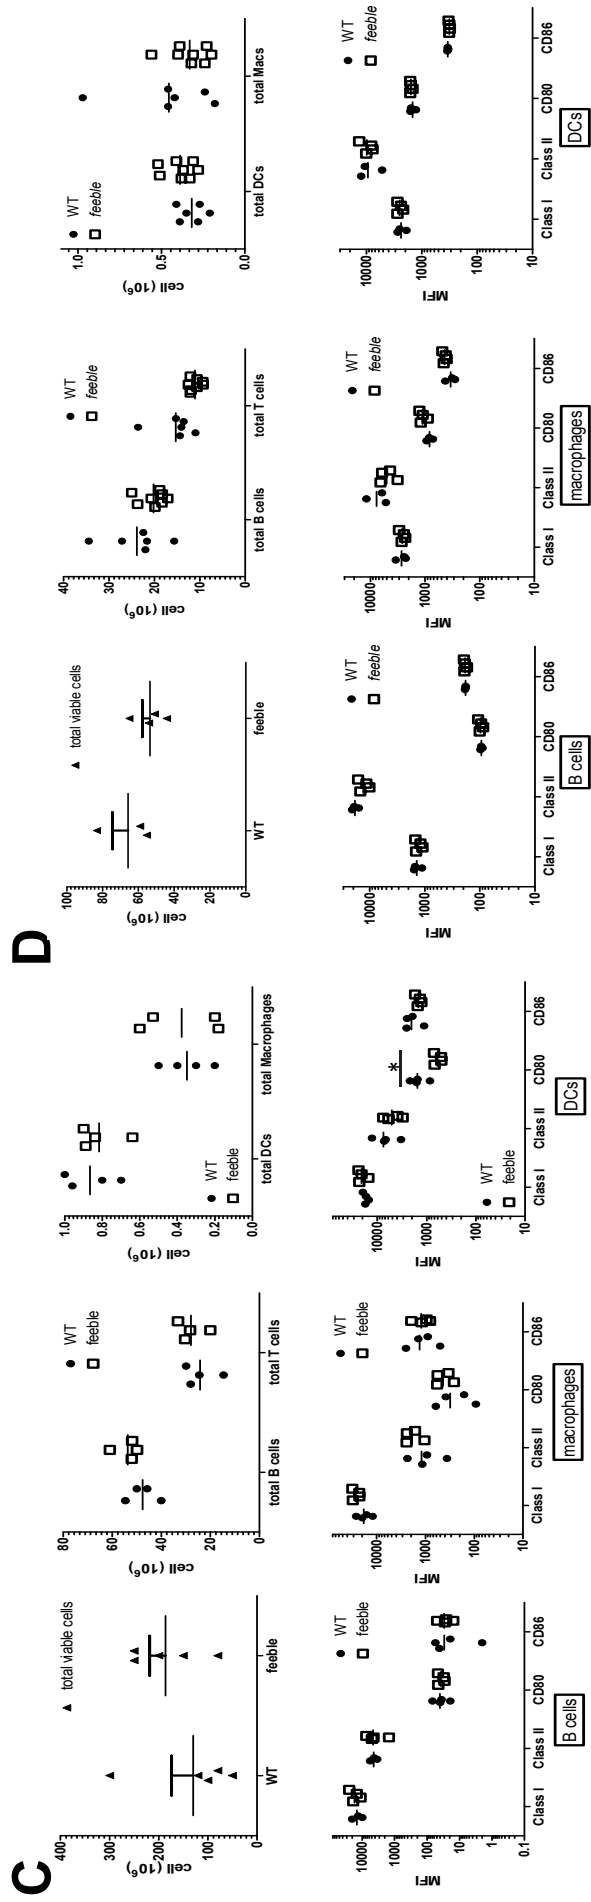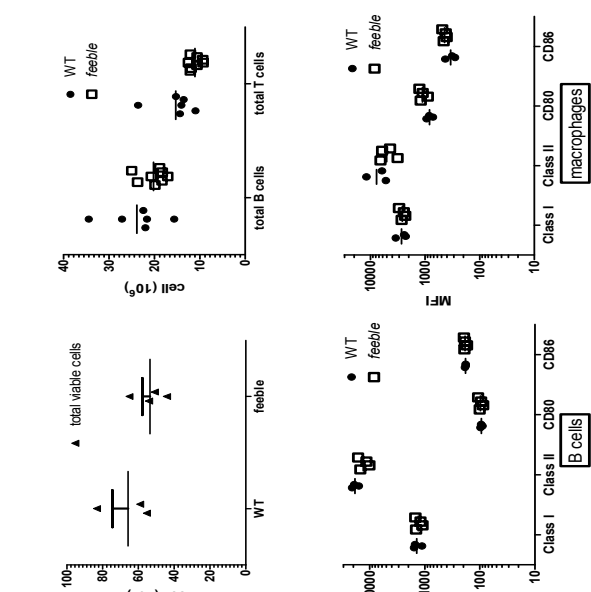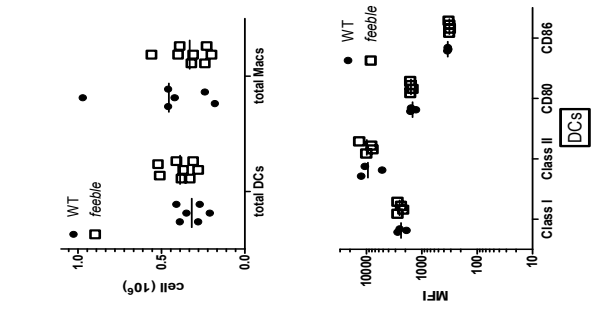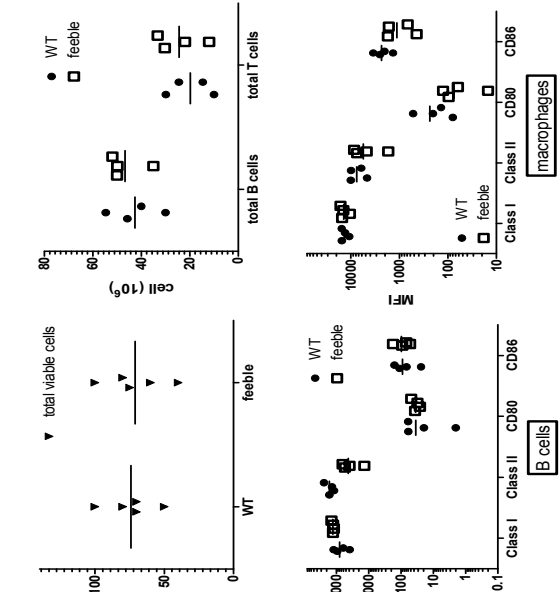

Supplement: ppat.1002915.s005.pdf [file ppat.1002915.s005.pdf]
